# Supplementary material
Source: Springer Nature journal article supplement (https://www.springermedizin.de/resource/supplementary/12987_2012_47_MOESM1_ESM.pdf/9680730)

Mild case

A

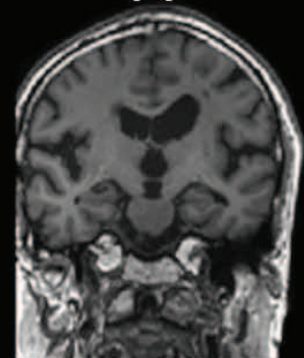

B

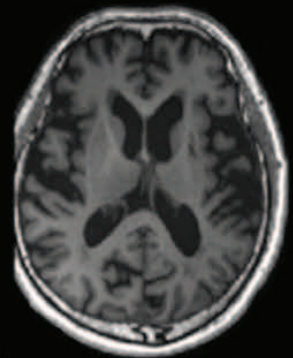

C

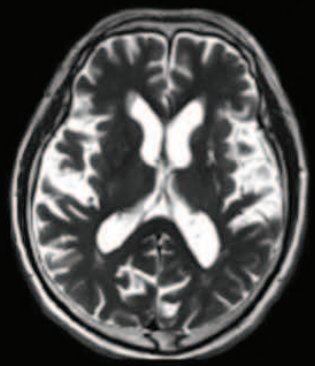

Fmaj

D

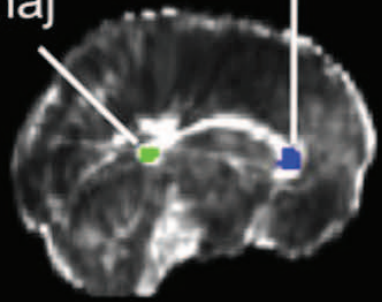

Fmin

SLF

E

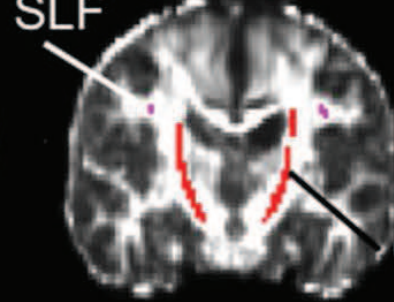

Fmin

F

ATR

CST

Fmaj

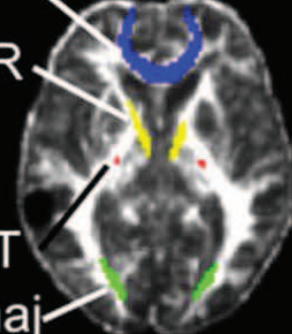

Moderate case

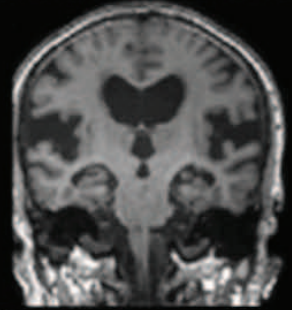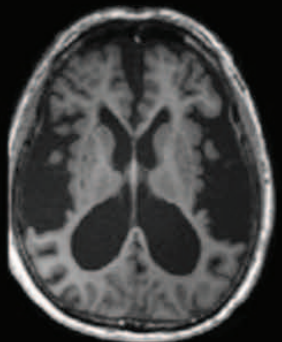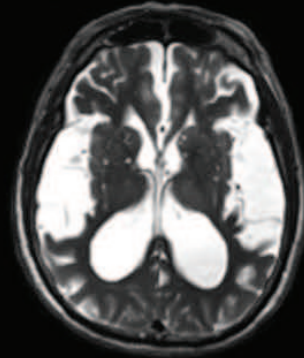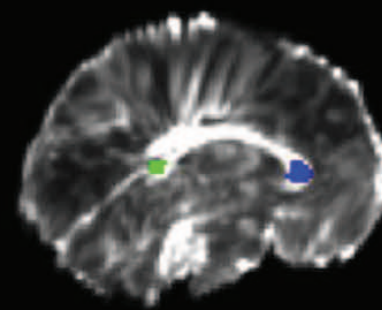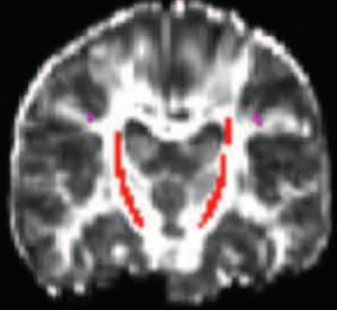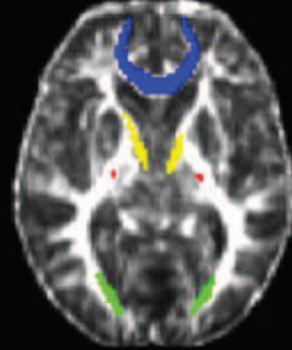

Severe case

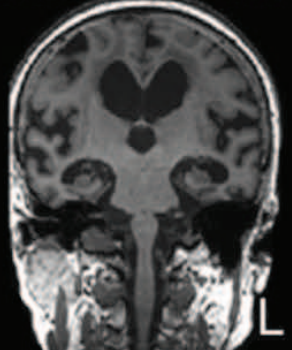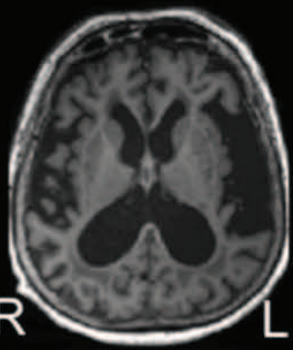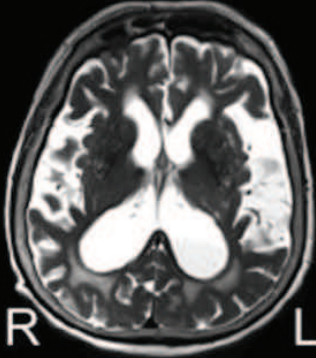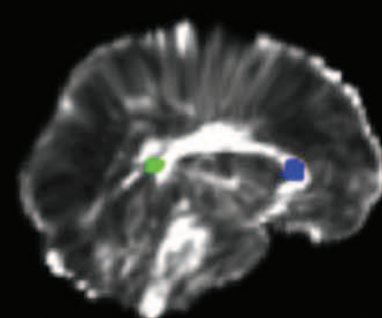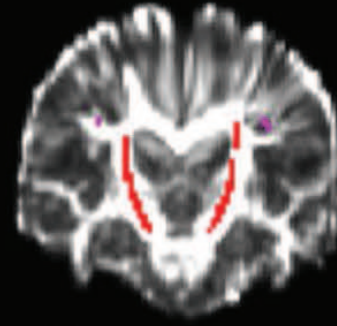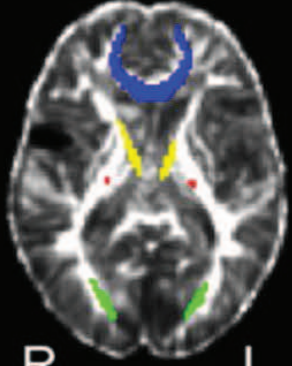

L

R

L

R

L

P

A

R

L

R

L

Supplement: MOESM1 [file 9680730]
